# Supplementary material for: Tropospheric Ozone Assessment Report (TOAR): 16-year ozone trends from the IASI Climate Data Record
Source: Copernicus journal article supplement (doi:10.5194/egusphere-2025-1054), 2025-04-01
Supplement: Supplementary file [file egusphere-2025-1054-AC3-supplement.pdf]

Dear authors,

The TOAR Steering Committee wishes to express their gratitude to you (as well as all authors of articles in the inter-journal Community Special Issue for the second Tropospheric Ozone Assessment Report) for submitting your manuscript to Atmospheric Chemistry and Physics. Even though your article was submitted after the special issue deadline of November 30th, the scientific community will very likely associate it with the other articles from this special collection. Therefore, your article should also follow the rules that are defined in the guidelines for submitting articles to the TOAR-II Community Special Issue (see [https://igacproject.org/sites/default/files/2023-04/TOAR-II\\_Community\\_Special\\_Issue\\_Guidelines\\_202304.pdf](https://igacproject.org/sites/default/files/2023-04/TOAR-II_Community_Special_Issue_Guidelines_202304.pdf)): “To avoid confusion with the final assessment papers, “TOAR” or “Tropospheric Ozone Assessment Report” may not appear in the title of the paper, nor should the paper claim to be an official TOAR publication. However, it is acceptable to refer to TOAR in the manuscript as, for example, “In the context of the Tropospheric Ozone Assessment Report (TOAR) Phase Two focus working group on XYZ, etc.”.”

We therefore ask you to change the title of your article and remove the explicit reference to TOAR from the title.

This comment, of course, has no bearing whatsoever concerning the scientific quality or potential impact of your manuscript.

We kindly ask for your understanding.

Martin Schultz and Helen Worden on behalf of the TOAR-II Steering Committee

We would like to thank the TOAR Steering Committee for his guidance. As requested, we have removed explicit reference to TOAR from the title. The updated title of our manuscript is:

“Assessment of 16-year tropospheric ozone trends from the IASI Climate Data Record”

We appreciate the opportunity to contribute to this special issue.
